# Supplementary material for: High-Resolution Observations in the Western Mediterranean Sea:The REP14-MED Experiment
Source: Copernicus journal article supplement (doi:10.5194/os-2016-82), 2016-11-01
Supplement: Supplementary file [file os-2016-82-RC2-supplement.pdf]

### **Review of the paper entitled:**

High-Resolution Observations in the Western Mediterranean Sea: The Rep14-MED Experiment

R. Onken et al.

Manuscript Number: OS-2016-82

The manuscript introduces the observational part of the REP14-MED experiment and gives a detailed description of measurements and instruments used for this experiment. REP14-MED is indeed an impressive project with a huge amount of different measurement strategies, instruments and scientists involved and it is therefore absolutely worthwhile to be published. Unfortunately, the authors remain shallow in their discussion and the manuscript is written like a technical report without any scientific aspects included at all. The authors emphasize that this article is designed for being an introduction to a Special Issue of Ocean Science and that they therefore do not want to present results of the observations. I do understand this but however I would expect more from this article or any article published in a scientific journal. There are several scientific aspects which can be discussed in such an introduction like:

- What is the overall scientific goal of the project?
- For what scientific reason were special measurements carried out? Scientific questions to be answered?
- What is the scientific goal of the special issue and which questions should be answered?
- What is the scientific content of each single manuscripts of the special issue (describing the results of the measurements)?

To my opinion none of these questions were discussed anyhow. Of course, the authors did a lot of honorable work and it is absolutely important to have such continuous measurements published, but however, a publication must be a scientific work and not only a presentation of data and instruments. For this reason I must reject the manuscript in its present form but I think by including a basic scientific discussion the article would be improved so that it can be presented once again.
